# Supplementary material for: Solar 27-day rotational period detected in wide-area lightning activity in Japan
Source: Copernicus journal article supplement (doi:10.5194/angeo-35-583-2017), 2017-04-24
Supplement: Supplementary file 1 [file angeo-35-583-2017-supplement.pdf]

Supplement of Ann. Geophys., 35, 583–588, 2017  
<http://www.ann-geophys.net/35/583/2017/>  
doi:10.5194/angeo-35-583-2017-supplement  
© Author(s) 2017. CC Attribution 3.0 License.

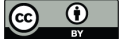

*Supplement of*

## **Solar 27-day rotational period detected in wide-area lightning activity in Japan**

**Hiroko Miyahara et al.**

*Correspondence to:* Hiroko Miyahara (miyahara@musabi.ac.jp)

The copyright of individual parts of the supplement might differ from the CC-BY 3.0 licence.

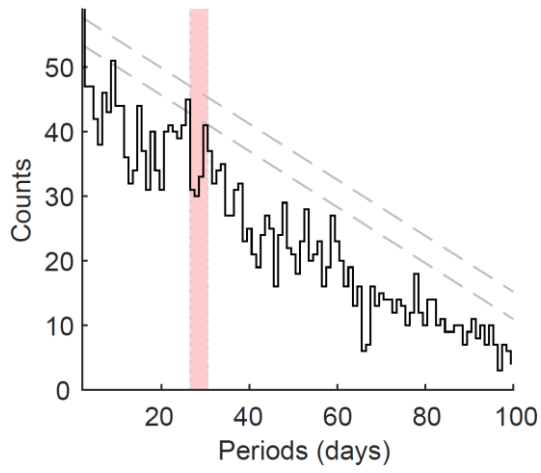

Figure S1. Periodicity of wide-area lightning activity covering more than 4 prefectures at the Sea of Japan side from November to March. The gray dashed lines correspond to 2 and 3 standard deviations. The red bars indicate the 27–30 day period.
